# Supplementary material
Source: PubMed Central journal article supplement (PMC7375364)
Supplement: JVI.00147-20-s0001.pdf [file JVI.00147-20-s0001.pdf]

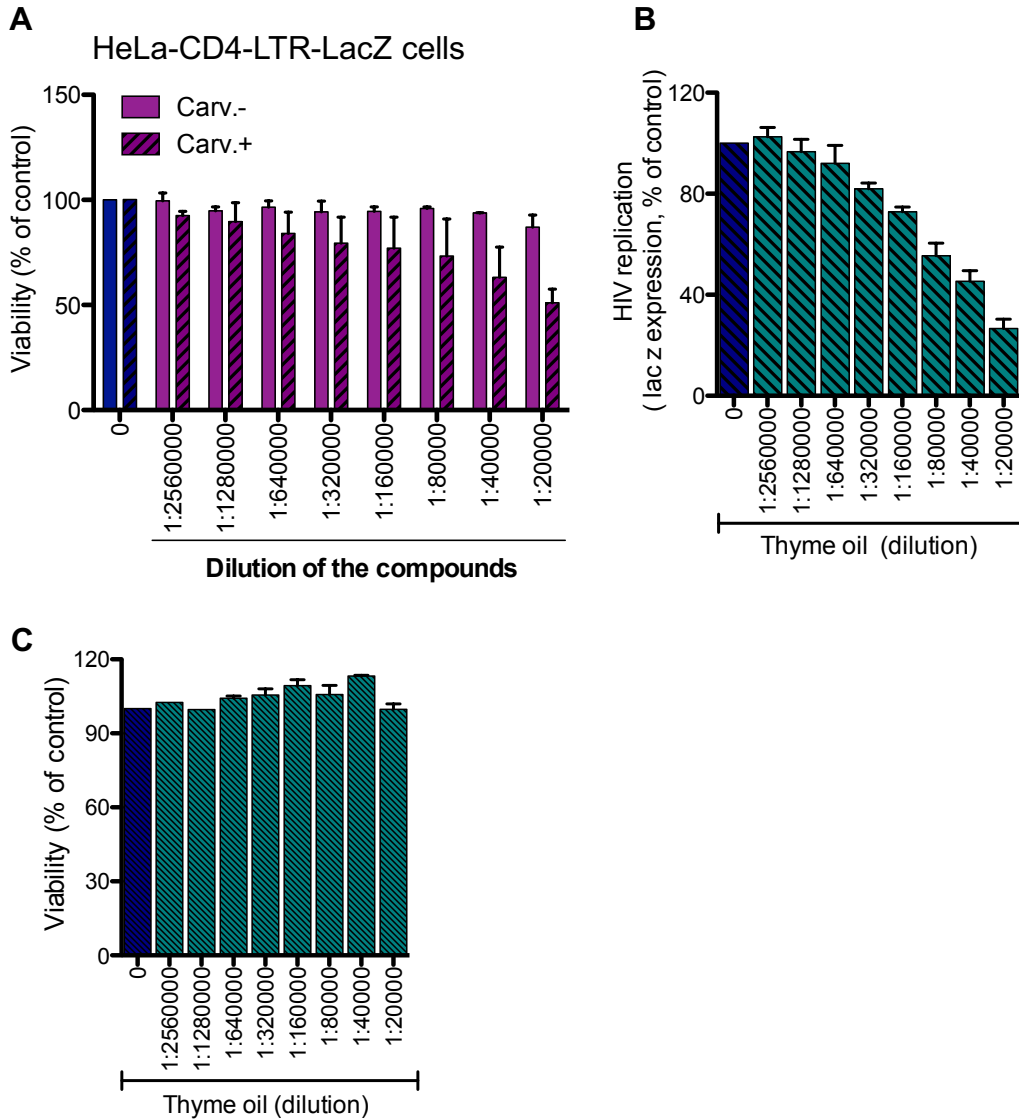

**Figure S1. Cytotoxicity assessment of the mixture of *Oregano* components with or without Carvacrol and activity of the thyme oil red. (A)** Cytotoxicity of the mixture of compounds present in the *Oregano* in HeLa-CD4-LTR-LacZ cells. Show is mean $\pm$ SEM of  $n=2$ . **(B, C)** Activity of the thyme oil red against HIV infection. **(B)** CPRG assays and **(C)** viability assays of the thyme oil incubated with HeLa-CD4-LTR-LacZ cells infected with NL4-3 for 72 hours. Data is the mean $\pm$ SEM of  $n=2$ .

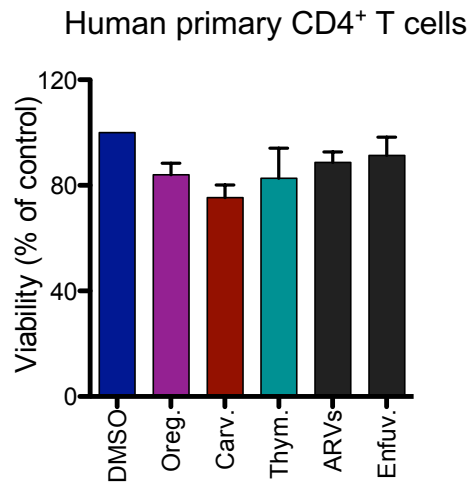

**Figure S2. Cytotoxicity assessment of the Oregano and related compounds in human primary CD4<sup>+</sup>T cells.** Antiretrovirals: ARVs: Raltegravir 200nM, Lamivudine 200nM and Efavirenz 100nM. Enfuvirtide (Enfuv., 1 $\mu$ g/mL), Oregano (1:40000 dilution), Carvacrol and Thymol (100 $\mu$ M). Shown is mean $\pm$ SEM of n=3.

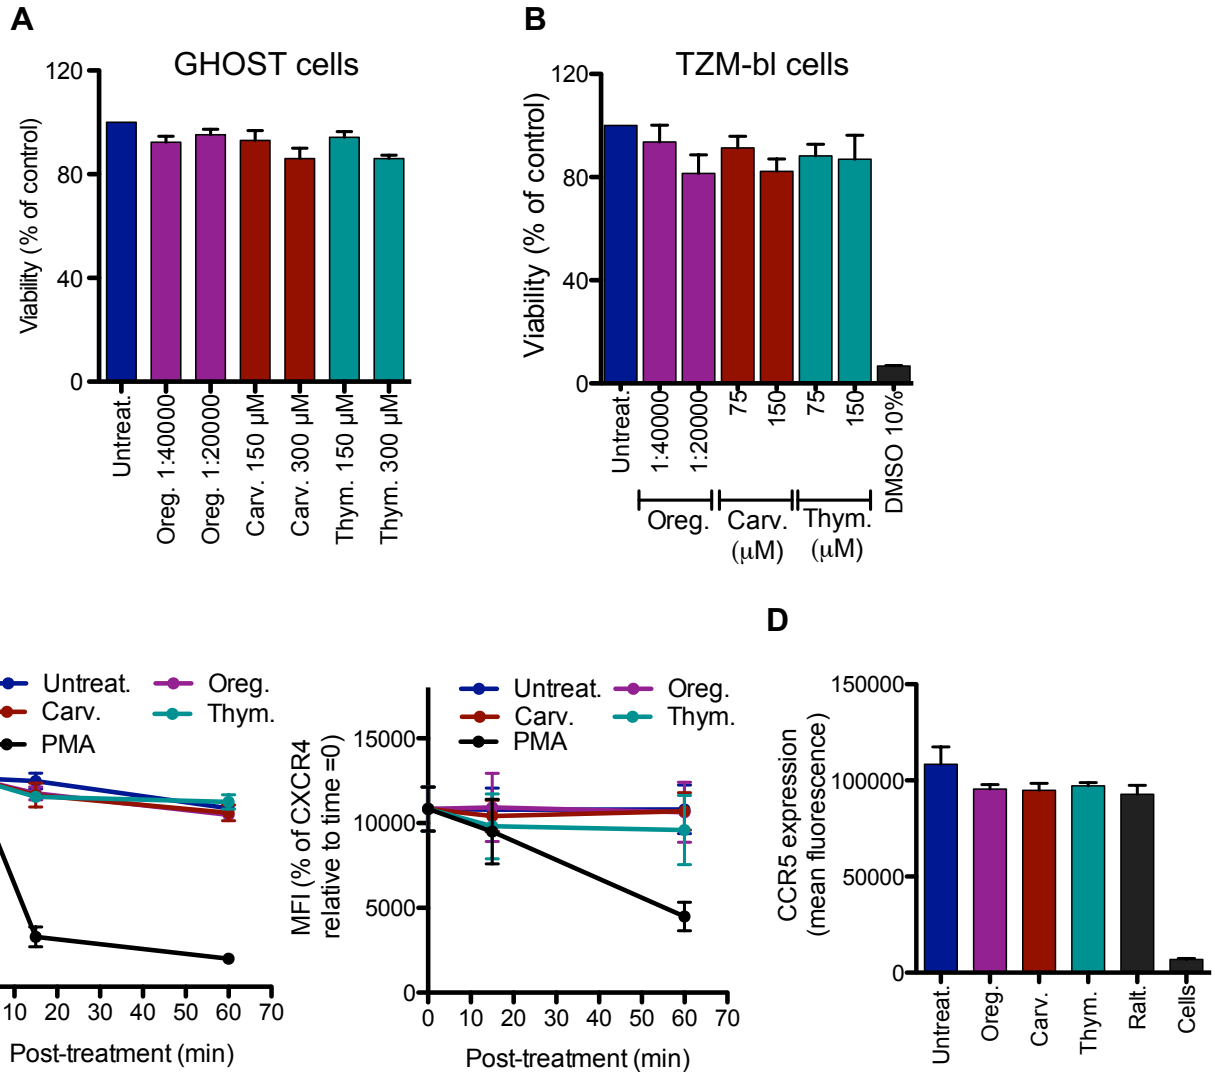

**Figure S3. Anti-HIV activity of the Oregano and related compounds on R5 tropic HIV-1.** (A, B) Cytotoxicity of Oregano and related compounds in (A) GHOST and (B) TZM-bl cells. Data is mean $\pm$ SEM of n=3 and n=4 respectively. (C) Expression of CD4 and CXCR4 receptors on HeLa-CD4-LTR-LacZ cells in presence of the oil or compounds at 1:40000 dilution or 100 $\mu$ M respectively. The phorbol ester phorbol myristate acetate (PMA, 100nM) used as control. Shown is mean $\pm$ SEM of n=2. (D) Expression of CCR5 receptor on GHOST cells after 6 hours incubation with oil or compounds at 1:40000 dilution or 100 $\mu$ M respectively. Raltegravir (100nM). Shown is mean $\pm$ SEM of n=3.

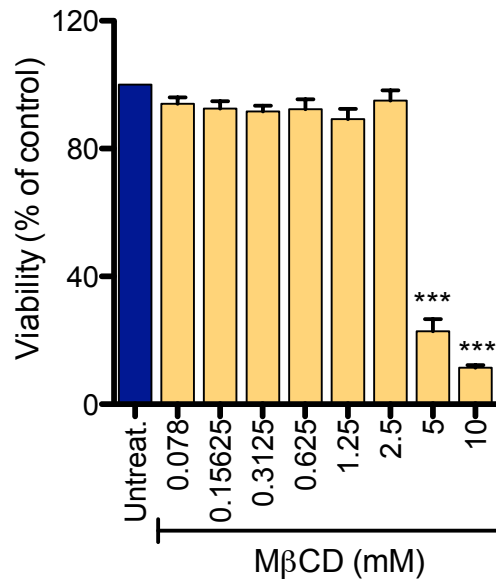

**Figure 4. Cytotoxicity assessment of the Methyl-β-cyclodextrin (MβCD), a cholesterol depleting compound, in TZM-bl cells.** TZM-bl cells were incubated with MβCD and luminescence determined 72 hours later. Data is the mean±SEM of n=3. One-way ANOVA followed by Turkey post-test were used for statistical analysis. \*\*\* p < 0.0001.

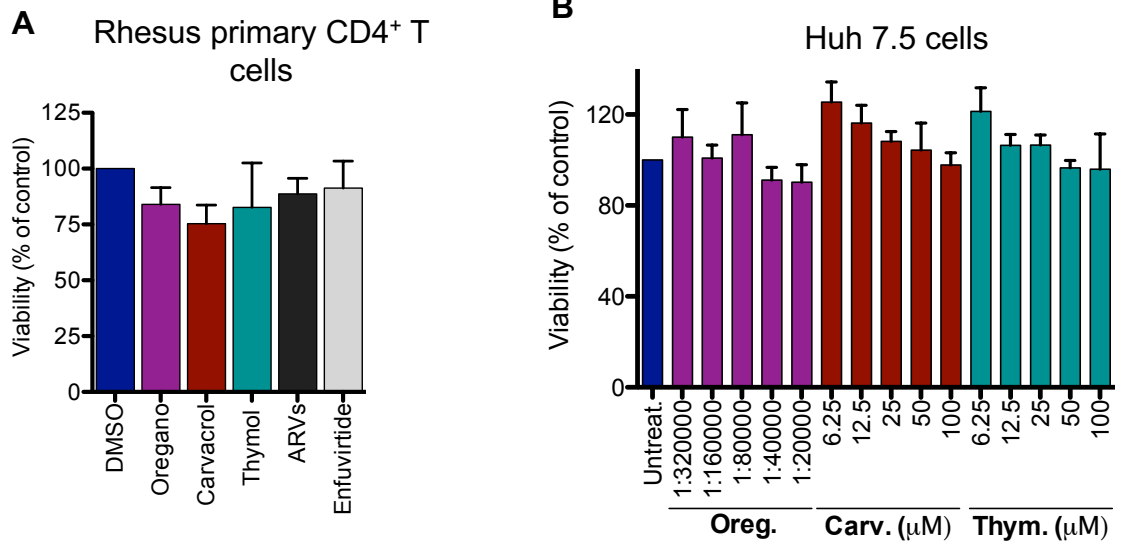

**Figure S5. Cytotoxicity assessment of the Oregano and its related compounds on different cell types.** Cytotoxicity of Oregano and related compounds in: **(A)** Rhesus primary CD4<sup>+</sup>T cells. Antiretrovirals: ARVs (Raltegravir, Emtracitabine, Tenofovir, 200nM). Oregano (1:40000 dilution), Carvacrol and Thymol (100μM), Enfuvirtide (1μg/ml). Shown is mean±SEM of n=2. **(B)** Huh 7.5 cells. Data is mean±SEM of n=3.
